# Supplementary material for: Reduction Evaluation and Management of Agricultural Non-Point Source Pollutant Loading in the Huntai River Watershed in Northeast China
Source: Copernicus journal article supplement (doi:10.5194/hess-2018-339), 2018-07-09
Supplement: Supplementary file [file hess-2018-339-AC5-supplement.pdf]

# 1 Reduction Evaluation and Management of Agricultural Non-Point 2 Source Pollutant Loading in the Huntai River Watershed in 3 Northeast China

4 Yicheng Fu, Wenqi Peng\*, Xiaoyu Cui, Jinyong Zhao

5 *State Key Laboratory of Simulation and Regulation of River Basin Water Cycle, China Institute*  
6 *of Water Resources and Hydropower Research*

7 \* Corresponding author, E-mail: pwq@iwhr.com

## 8 **Abstract:**

9  
10 With the raise of environmental protection awareness, applying models to control **non-**  
11 **point source (NPS)** pollution has become a key approach for environmental protection and  
12 pollution prevention and control in China. In this study, we implanted the **semi-conceptual**  
13 **model Soil and Water Assessment Tool (SWAT)** using information on **precipitation runoff**, land  
14 use, soil and slope. The model was used to quantify the spatial loading of NPS nutrient **total**  
15 **nitrogen (TN) and total phosphorus (TP)** to the **Huntai River Watershed (HTRW)** under two  
16 scenarios: without and with projected buffer zones of approximately 1 km within both banks of  
17 the Huntai, Taizi and Daliao river trunk streams and 5 km around the reservoirs. Current land-  
18 use types within the buffer zone were varied to indicate the natural ecology and environment.  
19 The **Nash-Sutcliffe efficiency coefficient ( $E_{NS}$ )** and  $R^2$  for flow and predicted nutrient  
20 concentrations (TN and TP) in a typical hydrological station were both greater than 0.6, and the  
21 relative deviation ( $|Dv|$ ) was less than 20%. Under the **status quo scenario (SQS)**, the simulated  
22 soil erosion in the HTRW per year was 811 kg/ha, and the output loadings of TN and TP were  
23 19 and 7 kg/ha, respectively. The maximum loadings for TN and TP were 365 and 260 kg/ha,

24 respectively. Under **environmental protection scenarios (EPS)**, the TN and TP pollutant  
25 loadings per unit area were reduced by 26% and 14% annually, respectively. Loading analysis  
26 showed that land-use type is a key factor controlling NPS pollution. The NPS pollutant loading  
27 decreased under the simulated EPS, indicating that environmental protection measures may  
28 reduce the NPS pollutant loading in HTRW. The 22% pollutant reduction under the EPS. We  
29 finally quantified the ratio of the land area lost to agricultural production compared with that  
30 lost to ecosystem services. We calculated the agricultural yield elasticity and concluded that the  
31 corresponding crop yield would be reduced by 2% when the land area for ecosystem services  
32 in the basin increased by 1% under the EPS.

33 **Keywords:**

34 Agricultural Non-Point Source pollutant loading; Environmental Protection Scenarios; Agro-  
35 ecosystem services; Huntai River Watershed

36 **1. Introduction**

37 The non-point source (NPS) pollution strongly influences soil restoration, people living  
38 environments and water quality safety. Many articles have indicated that underlying surface  
39 conditions and rainfall features will affect the spatial distribution characteristics of NPS  
40 pollution nutrient loading (Robinson et al.,2005). Pollutant loadings from different land-use  
41 types vary significantly (Niraula et al.,2013). The NPS pollutant concentration in water depends  
42 on the discharge loading and pollutant treatment rate. Presently, a lot of academics prefer  
43 loadings over concentrations to express their study (Yang et al., 2007; Ouyang et al.,2010;  
44 Outram et al., 2016). Land-use types and underlying surface status will impact the nutrient  
45 resources and spatial distribution characteristics (Ahearn et al., 2005; Ouyang et al., 2013). The  
46 spatial-temporal characteristics of NPS pollutants can be studied based on panel data statistical

47 analysis and multi-model simulation. The SWAT model can be implemented for NPS pollutant  
48 loading and provide the optimization programme for comprehensive ecological protection of  
49 watershed (Shen et al.,2011). A large number of literatures have demonstrated that combining  
50 different land use scales, land coordinated development patterns and geomorphologic landscape  
51 characteristics can decrease NPS pollution loadings (Sadeghi et al.,2009).

52 Distributed physically-based and semi-conceptual models can effectively calculate and  
53 evaluate NPS pollution loading spatial layouts. In the late 20<sup>th</sup> century, American scientists at  
54 United States Department of Agriculture-Agricultural Research Service (USDA-ARS)  
55 developed the SWAT model (Arnold et al.,1998), which has been widely used to simulate  
56 runoff, estimate NPS pollution loading and implement Best Management Practices (BMPs).  
57 SWAT is comprehensively used in evaluating the influence of NPS pollution loading on  
58 different regional natural landscape characteristics and land-use types, including vegetation  
59 coverage, underlying surface, agricultural generation modules and hydrometeorology data. The  
60 changes of agricultural NPS contaminations based on the diversification of land development  
61 types have been analyzed and researched by SWAT models (Ficklin et al.,2009; Shen et al.,  
62 2013). **The SWAT model's main body contains 80 mathematical equations and 530 intermediate**  
63 **variables**, which have been widely used to determine and evaluate NPS pollutant loading spatial  
64 distribution characteristics to quantitative the impacts of land use on NPS pollutants and soil-  
65 water loss sensitive evaluation on a watershed scale (Gosain et al.,2005; Ouyang et al., 2009;  
66 Logsdon et al.,2013).

67 HTRW is the basic product manufacturing base in China and a primary tributary of the Liaohe  
68 River Basin, which has been heavily polluted in recent years. The main NPS pollution in the  
69 Liaohe river is agricultural NPS pollution, and most NPS pollution occurs in the HTRW within

70 Liaoning province (Liaoning Province DEP, 2011). Therefore, the HTRW faces enormous  
71 pressure from water pollution risk. The policy of ‘Revitalization of Old Industrial Bases in  
72 Northeast China’ has caused great spatial pattern changes to the land-use (Liu et al.,2014). This  
73 accelerating urbanization changes the current land use in a way that results in more NPS  
74 pollution to local surface waters.

75 The SWAT model was applied to quantify the TN and TP output loading in HTRW under  
76 different land uses, assess the NPS pollutant loading reduction, and analyse the spatial  
77 distribution characteristics under the condition of land cover change. Using SWAT, nutrient  
78 losses were simulated and evaluated under two scenarios: the status quo scenario (SQS, without  
79 buffer zones) and the ‘environmental protection’ scenario (EPS, with buffer zones). We studied  
80 NPS pollution problems in HTRW according the following steps and illustrated in the Fig. 1:  
81 (1) define the underlying surface (land-use) status for HTRW; (2) implement a SWAT model  
82 to simulate the NPS pollution loading (TP and TN) of the HTRW under two scenarios; (3)  
83 compare the NPS pollution loading under the two scenarios and assessed the effect of reducing  
84 pollutant loading under EPS; and (4) analysed the correlation between arable land area  
85 decrease/agro-ecosystem services increase and crop yield reduction using a simple static model.

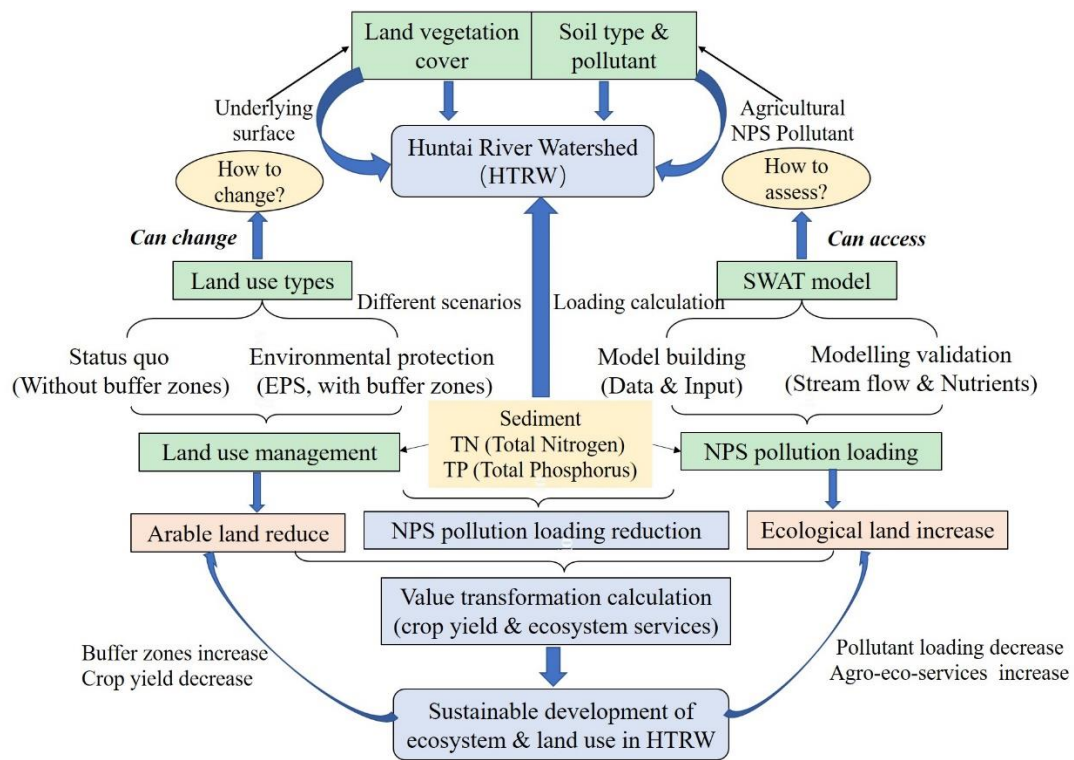

86

87 **Fig. 1. Reduction assessment and value transformation system for agricultural NPS**  
 88 **loading.** The solid thick arrows indicate the degree of influence or the process output. The thin  
 89 arrows indicate the process input.

90 **2. Materials and methods**

91 **2.1 Hantai River Watershed**

92 The HTRW (40°27'~42°19'N, 121°57'~125°20'E) is situated in the Liaoning province (Northeast  
 93 China), and the river basin area is  $2.73 \times 10^4$  km<sup>2</sup>, which comprises approximately 1/5 of the Liaoning  
 94 province (Fig. 2). The HTRW is a tributary of the Liaohe River (one of China's larger water systems)  
 95 and consists of the Hunhe, Taizi, and Daliao Rivers. The Taizi River, Hunhe River, and Daliao River  
 96 watersheds are the HTRW's sub-catchments. The HTRW varies topographically with low mountains  
 97 in the eastern portion and alluvial plains in the other areas. The northeast region has a high elevation.  
 98 Loamy soils are mainly distributed in the alluvial plain, and the average slope in the lower HTRW is

99 approximately 7%. The HTRW area consists of the cities of Shenyang, Fushun, Liaoyang, Anshan,  
100 Benxi, and Yingkou, most of Panjin city. Stream flow and nutrients were measured on five monitoring  
101 stations: Beikouqian, Dongling Bridge and Xingjiawopeng in the Hunhe River and Xialinzi and  
102 Tangmazhai in the Taizi River. HTRW has a temperate continental climate with an average annual  
103 temperature of 7°C and precipitation of 748 mm.

104 The HTRW is in a conventional agricultural farming (farming-dominated products), with  
105 much of the farmland dominated by crops. The total farmland area is 10,763 km<sup>2</sup> (39% of the  
106 total area), including 4,086 km<sup>2</sup> of paddy fields (dominated by rice) and 6,677 km<sup>2</sup> of dry  
107 farmland (including corn, soybean, vegetables and other crops). The upper Hunhe and Taizi  
108 river areas are mountains (69%), plainlands (25%) and low hills (6%). The HTRW's economic  
109 output value is dominated by agricultural cultivation. The farmland is mainly distributed in the  
110 alluvial plain area and valleys in riverine belts. Considering land use, pollutant sources and  
111 rainfall, the HTRW faces a high risk of agricultural pollution. Heavy fertilizer use and soil  
112 erosion in the upper HTRW has led to its heavy water pollution. For example, the Dahuofang  
113 reservoir (located in the middle reaches of Hunhe River) and the water resources-environment  
114 conservation area in its upper sections are facing serious threats, and the agricultural NPS  
115 pollution is becoming increasingly severe with no effective controls. Fertilization in the HTRW  
116 is predominantly nitrogen, followed by potassium and phosphorous. Heavy use of chemical  
117 fertilizers includes mainly DAP (diammonium phosphate), urea and a small amount of N-P-K  
118 (nitrogen-phosphorus-potassium mixed fertilizer). Acetochlor and Atrazine are mainly used on  
119 dryland, and Butachlor is mostly used in paddy soil. Based on 2006-2012 statistical information,  
120 the fertilizer and pesticide quantities (such as Methamidophos and Plifenate) used in the  
121 watershed fluctuated annually. The upper portions of the Huntai and Taizi Rivers are dominated

122 by mountains, and the crops are cultivated and harvested by hand. We obtained these data and  
 123 information, which would normally be inaccessible, through onsite investigations, inquiry visits,  
 124 case studies, example analyses. At present, farmland weeds and pests are mainly controlled by  
 125 pesticides and herbicides. The upstream is rich in forest resources, and the downstream has a  
 126 large amount of farmland. Special landscape layout makes the HTRW a potential area for  
 127 agricultural NPS pollution. **The reservoir outflow was used as an input into SWAT.**

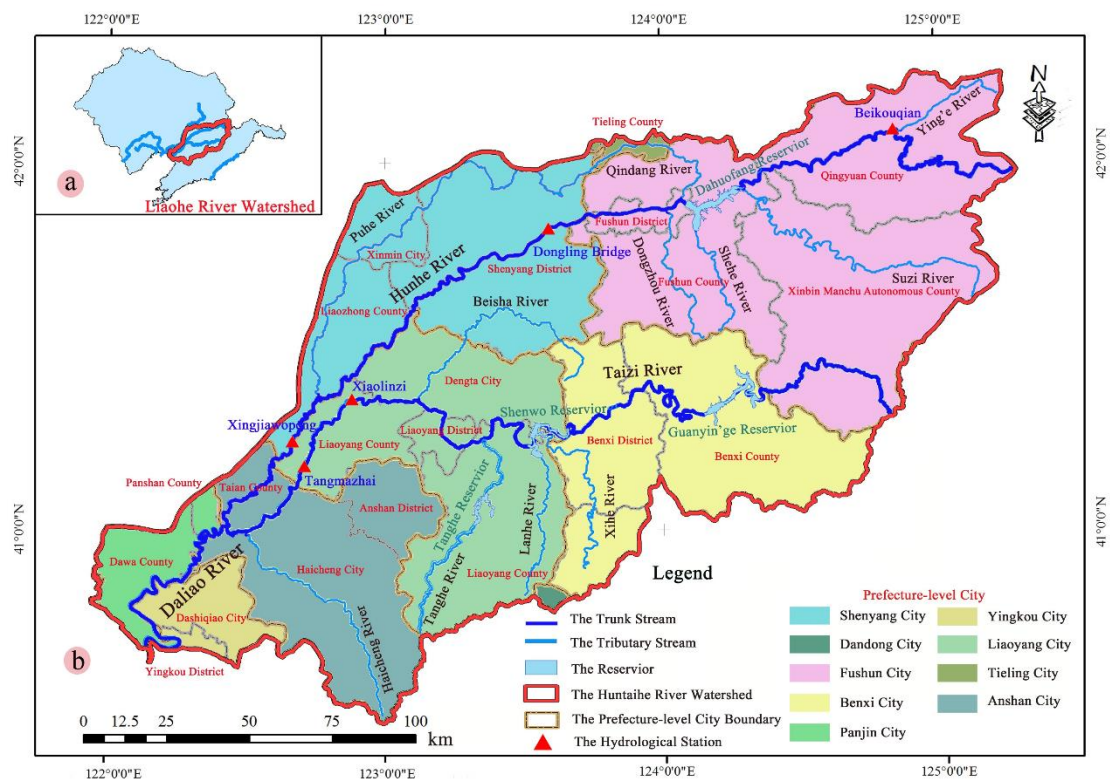

128

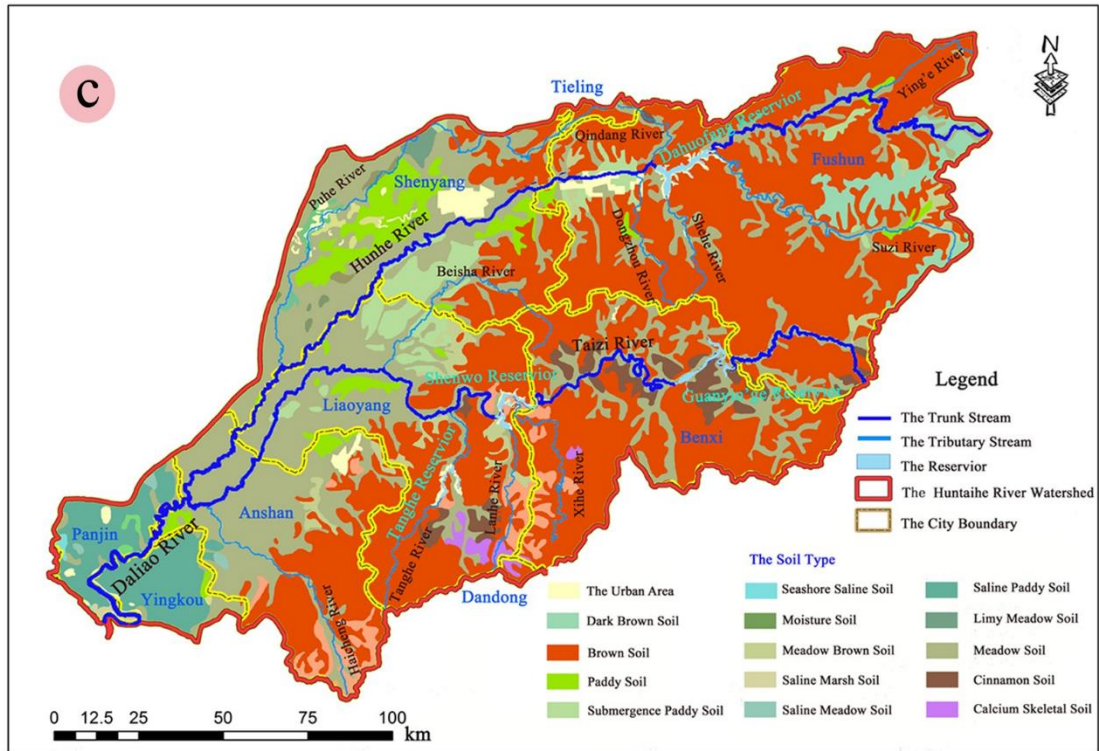

129

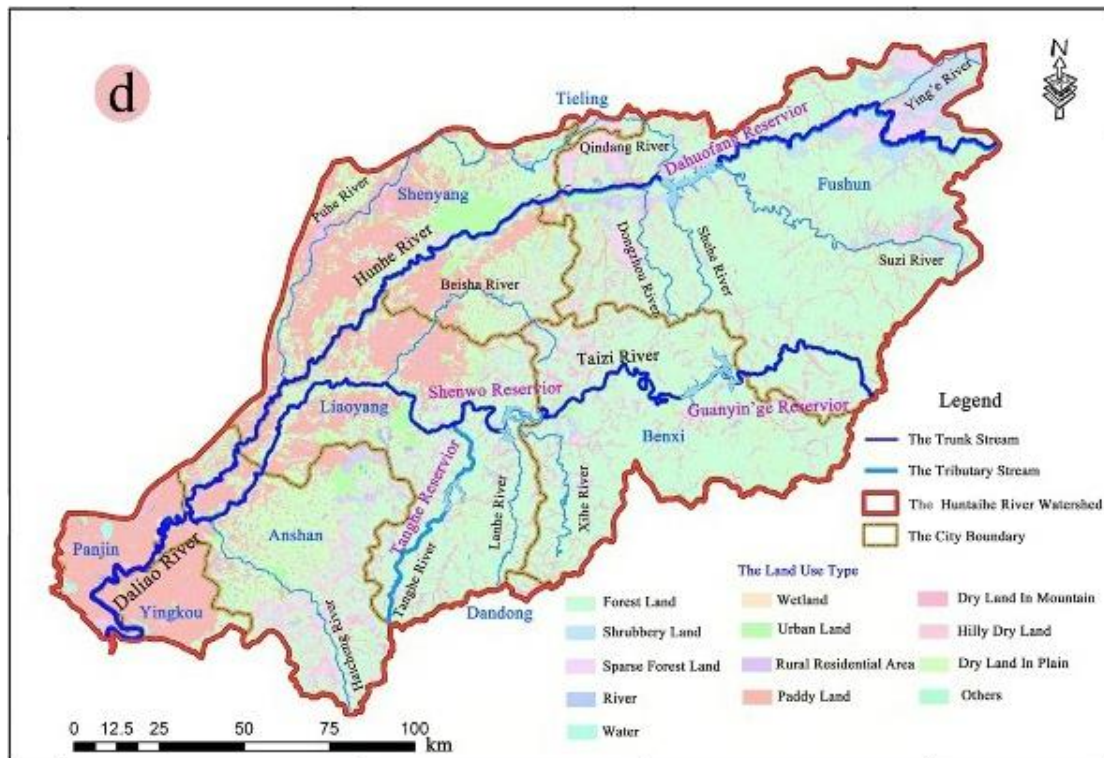

130

131 **Fig. 2.** Basic HTRW information. a. Location of the HTRW; b. Geographical zoning of HTRW;

132 c. Land use type of HTRW; d. Soil type of HTRW. The figure was cited from [www.geodata.cn](http://www.geodata.cn),



133 which is a national science and technology basic conditions platform and an earth system  
134 science data sharing platform. The figure information is public. The Liaoning province Water  
135 Resources Administrative Bureau granted permission for the basic information on the HTRW.

## 136 **2.2 Setting the scene**

137 To determine the correlation between land use types and agricultural NPS pollutant loading, the  
138 numerical analysis and comprehensive comparison method was used for different land use types  
139 under ecological development and urbanization. In this study, two scenarios were developed: The  
140 status quo scenario (SQS) and the environmental protection scenarios (EPS).

141 The SQS was draw up based on the current environmental protection mode and  
142 socioeconomic developmental structure. The land-use was based on the existing development  
143 pattern and environmental protection policies. BMPs information and environment-friendly  
144 land-use patterns (amount of pesticide and fertilizer used, cultivated land area, and crop species)  
145 were gained from Liaoning Province statistical yearbooks-2013 and field surveys of land  
146 consolidation.

147 The EPS was defined as considering the regional developmental prospects, eco-friendly  
148 environment restoration strategy of the HTRW. Buffer zones were defined as **One kilometer**  
149 **within both banks of the Hunhe, Taizi and Daliao rivers (the width of the Buffers was One**  
150 **kilometer, the length was the same as the river) and 5 km around the reservoirs.** In the buffer  
151 zones, traditional land-use patterns were changed to restore the natural landscape (forest and  
152 grassland) and ecological environment. This scenario is not only expected to preserve the  
153 fundamental agricultural position in the watershed but also to improve the watershed's  
154 ecosystem service value and biodiversity by reducing the amount of fertilizers and pesticides  
155 used for agricultural productivity. These scenarios can provide a scientific basis for further  
156 understanding characteristics of the nitrogen and phosphorus loading characteristics and

157 cultivated field plantation potential adjustment in HTRW.

158 To simulate the hydrological characteristics by SWAT, we first divided the HTRW into a set  
159 of sub-basins based on DEM data. We then divided sub-basins into Hydrological Response  
160 Units (HRUs). Hunhe River, Taizi River, and Daliao River sub-catchments were delineated into  
161 DEM and river system and further divided by 29 small calculation modules based on 184 HRUs.  
162 The downstream of Hunhe River, Taizi River, and Daliao River has little change in terrain, the  
163 direction of water flow is single, and the source of contaminant is relatively stable. Therefore,  
164 some small calculation units are combined during the calculation process to reduce calculation  
165 time and improve operating efficiency. We used the monitored data to calibrate and validate  
166 the stream flow and pollutant concentration changes in the HTRW. The land development  
167 patterns in the two scenarios were then input to the SWAT model to simulate the TN and TP  
168 pollutant loading. Finally, the spatial dynamics and ecological service value assessment in NPS  
169 pollution loading was analysed based on land-use. We also analyzed the negative correlation  
170 between the agro-ecological value and the farmland area.

171 The wastewater pollutant source is along both channels of the Taizi, Hunhe, and Daliao River  
172 trunk streams. The risk of NPS pollution is mainly related to the patterns of farmland use and  
173 agricultural planting. The secondary region for water pollution is mainly along the HTRW  
174 tributaries. Therefore, we paid special attention to the comparative analysis of pollutants  
175 generated by the cultivated field adjacent to the water channels.

## 176 **2.3 Methods**

### 177 **2.3.1. SWAT principle**

178 SWAT is a semi-physical and distributed hydrological model developed to quantitatively  
179 predict the responsivity of water quality and quantity to land-use and environmental protection

180 methods on a watershed scale (Gassman et al.,2007). The primary data imported to run the  
181 model includes soil type, vegetation status/land landscape, DEM (Digital Elevation  
182 Model)/topography, and BMPs. The watershed SWAT model's computing units are the sub-  
183 watershed scale and HRUs. Hydrological response unit demarcation is based on land use, soil  
184 type and slope.

185 SWAT HRUs are automatically divided by geomorphological features, land development  
186 intensity change, DEM, and soil conditions. To calculate the HRUs, we selected 0% land use,  
187 slope/elevation, and soil classification/attributes as the initial value on the HTRW scale.  
188 Therefore, 184 HRUs were delineated to determine NPS pollutant loading. HRUs are the  
189 minimum units for predicting pollutant output loading, which is automatically generated by  
190 superimposing land-use and soil types within the sub-river basin. Due to the HTRW's large  
191 area and widely changing terrain slope, the HTRW was divided into three levels with slopes of  
192 10 and 30 nodes. The area threshold percentages for land use, soil and slope were 5%, 8%, and  
193 15%, respectively. To evaluate pollutant loss and spatial characteristics, the soil nutrient loss  
194 curve, water-salt balance equation, and stage-discharge curve were applied. Meteorological  
195 data (the min and max temp is -30°C and 40°C, respectively) were gained from automatic  
196 weather stations and hydrological station network in 12 cities within the HTRW. BMP data,  
197 such as crop irrigation time (late April and early May) and water, crop harvesting period,  
198 fertilizer recovery efficiency, fertilizer dosage, and spatial layout of the overall land use  
199 planning were obtained from environmental and agricultural management departments or  
200 collected by current questionnaire survey.

201 SWAT is mostly used to evaluate N and P pollutants production, diffusion and movement,  
202 and transformation. These pollutions whole process control occur simultaneously with the soil

203 erosion, hydrological cycle and reasonable utilization of land resource. SWAT considers 5  
204 forms of N and 6 forms of P. The N and P cycles contain mineralization, decomposition,  
205 solidification/stabilization, and conversion. The NPS pollutant loading function is the basis for  
206 evaluating N and P distribution, transportation and transformation (Zhang, 2005). Organic N  
207 and P loss was calculated by SWAT by the comprehensive evaluation model of the NPS  
208 pollutant loading, variations of nutrient elements and salt contents of soil, soil environment,  
209 crop growth, and crop yield. The total amount of nitrate lost in the soil was calculated by the  
210 multiplication of water volume and nitrate concentration in the water. Water volume consisted  
211 of groundwater runoff, surface runoff, and interflow/subsurface flow/groundwater recession  
212 flow. The soluble P removed in the runoff was estimated using the P concentration in the soil  
213 partitioning coefficient, surface soil layer, and runoff volume. The concentration of soluble P  
214 in the water was calculated by topsoil P stocks, runoff variation and influencing factors, soluble  
215 P ratio, and soil particle-size characteristics.

216 Surface runoff from daily rainfall data and land use in HRU/sub-basin were calculated and  
217 evaluated using the SCS-CN method. Using the SCS-CN curve, vertical distribution  
218 characteristics and temporal stability of soil water, runoff module number of the ground water,  
219 Soil saturated water content movement and hydraulic conductivity were determined, as well as  
220 the related parameters for daily rainfall. The total discharge temporal variations of runoff from  
221 sub-basin/HRUs is the dynamic equilibrium of groundwater runoff flow, surface runoff flow,  
222 and interflow/subsurface flow. The main routes for water cycle simulation in the SWAT follow  
223 either the network-node mode or the natural-artificial dualistic water cycle mode in river basins  
224 under changing conditions. We used the dualistic mode SWAT flow varies with the dynamic  
225 changes in infiltration, evaporation, transport, and nutrient cycling (Arnold et al.,1998). Direct

226 runoff is surface runoff resulting from rainfall, which includes surface and return flows.  
227 Baseflow is part of the groundwater recharge to river runoff. Most of the base flow and direct  
228 runoff separation methods are performed by mathematical methods. We used Digital-Filter-  
229 Equation to divide the base flow:

$$230 \quad \begin{cases} q_t = \beta \cdot q_{t-1} + \alpha(1 + \beta)(Q_t - Q_{t-1}) \\ b_t = Q_t - q_t \end{cases} \quad (1)$$

231 Here,  $q_t$  is the surface runoff at time  $t$ ;  $Q_t$  is the total runoff at time  $t$ ;  $b_t$  is the base flow at time  $t$ ;  
232 and  $\alpha$   $\beta$  are filter parameters.

233 Digital filtering is an objective and effective method of base-stream separation. We assigned  
234  $\alpha = 0.5$  and  $\beta = 0.925$  in the HTRW (Arnold & Allen, 1999). The SWAT HRUs used the soil and  
235 water loss factors, hydrodynamic process of soil erosion, and the universal soil loss equation  
236 (MUSLE) to analyse erosion and sediment form, space distribution characteristic and  
237 influencing factor (Williams, 1975). Sediment was routed through channels using Bagnold's  
238 sediment transport equation (Bagnold, 1977). We used a 2009 version of SWAT to calculate the  
239 parameters.

### 240 **2.3.2. Model data input**

241 DEM, underlying surface status, geomorphology, soil properties, land vegetation,  
242 hydrological and meteorological data (rainfall, evaporation, temperature) were imported into  
243 the SWAT (Niraula et al., 2013). Fig. 3 shows the basic data used in the SWAT model. We used  
244 30×30 grid data (elevation) as the basis for DEM operation. We downloaded the DEM data for  
245 the HTRW location from the SRTM (Shuttle Radar Topography Mission) data pack. These free  
246 data can be obtained from the website, <http://srtm.csi.cgiar.org/SELECTION/inputCoord.asp>.  
247 The DEM was used to extract the study area and analysis the stream network structure in  
248 relation to geomorphologic features. The stream network in the HTRW was extracted using

249 1:250,000 digital water system data ([www.geodata.com](http://www.geodata.com)) as an auxiliary model to construct the  
250 HTRW stream network model. We delineated land-use types into 27 categories. The main type  
251 of HTRW land use and land cover change is forest (including orchard, 49%), dry land (24%),  
252 rice paddy (15%), urban land (vacant land, 8%), unused land (uncultivated land, 3%) and  
253 grassland (1%). Soil types were classified into 26 types. The primary soil types are brown soil  
254 (54%), meadow soil (30%) and paddy soil (11%). The underlying substrate database was  
255 constructed based on the soil type database using the soil properties and land development data  
256 as underlying substrate parameters (topography characteristics, surface vegetation and soil  
257 types and distribution characteristics). The soil parameters were got from national earth system  
258 science data sharing infrastructure database (<http://www.geodata.cn/aboutus.html>). The  
259 watershed meteorological data used in the current research include rainfall data for 1990-2009  
260 collected by 76 rainfall stations/hydrometric network and hydrometeorological data for 1990-  
261 2009 obtained by 12 city meteorological stations. The missing meteorological information can  
262 be estimated using the Long Ashton Research Station Weather Generator (LARSWG-5). **At**  
263 **least 3 sets of water monthly monitoring data for ammonia (such as NH<sub>3</sub> and NH<sub>4</sub>), nitrite (NO<sub>2</sub>),**  
264 **nitrate (NO<sub>3</sub>), TP, and TN, were available for 2006–2009.** We obtained information on plant  
265 species, cropping systems, sowing time, fertilization time, distribution pattern of soil  
266 productivity, and regional economic-social development from investigations and the statistics  
267 department in HTRW. The SWAT uses the LH-OAT (Latin Hypercube One-factor-At-a-Time)  
268 sensitivity analysis method and the SCE-UA (Shuffled Complex Evolution Algorithm)  
269 automatic calibration analysis method to determine the value of sensitive parameters.

270 Data information (scale, type, description) for SWAT in the HTRW are shown in Fig. 3. We  
271 imported the related soil and meteorological data for SWAT from the China Meteorological

272 Administration and Environmental-Ecological Science Data Center for West China. The China  
 273 Hydrology, Water Resources and Water Quality Monitoring Department of the HTRW  
 274 provided the automatic and regular monitoring hydrological data sequence. The Liaoning  
 275 Province Water Resources Administrative Bureau granted permission for the modelling the  
 276 pollutant generation response to different land utilization scenarios in the HTRW.

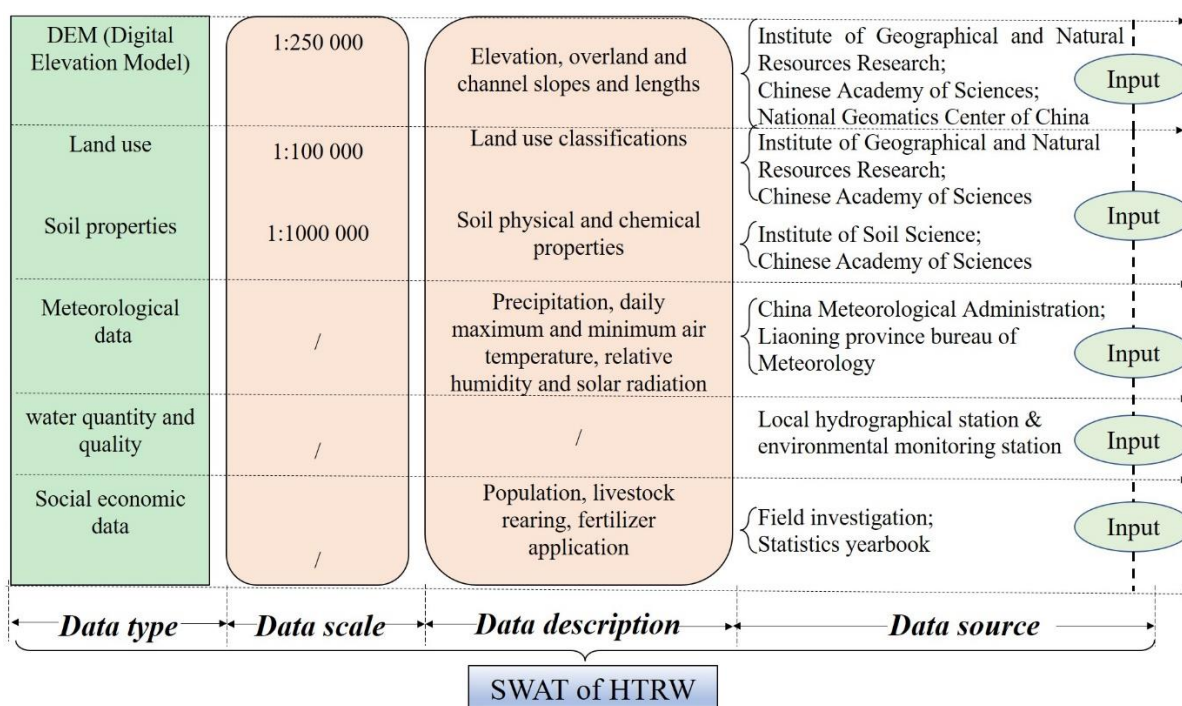

277  
 278 **Fig. 3.** HTRW data. The basic data imported into the SWAT model included spatial data and  
 279 attribute data. Spatial data includes DEM, land use and land cover data, soil spatial distribution  
 280 data, digital river network data, and the spatial location of meteorological stations and  
 281 hydrological stations. Attribute data mainly includes land use attribute database, soil type  
 282 attribute database, LARSWG-5 and hydro-meteorological data.

### 283 2.3.3. Calibration and validation

284 The monthly scale data were used to simulate SWAT. We used the open code SWAT-CUP  
 285 module to calibrate the parameters of SWAT in HTRW (Abbaspour et al.,2007). A sequential  
 286 uncertainty fitting algorithm had a higher calculation accuracy and efficiency, which was

287 extensively used in the SWAT-CUP module (Wang et al.,2014; Yang et al.,2008). We manually  
288 input the optimal parameters into the SWAT model for hydrology series simulation. The  $E_{NS}$   
289 (Nash-Sutcliffe efficiency coefficient),  $Dv$  (relative deviation), and  $R^2$  (certainty coefficient)  
290 were used to assess the runoff flow change of the HTRW hydrological station.

291 The runoff was calibrated, followed by N, P and other nutrients. The runoff was calibrated  
292 and tested using monitoring data from the Xingjiawopeng and Tangmazai hydrological stations  
293 (Fig. 2). The simulated values of N and P were calibrated using on-site monitoring data from  
294 Dongling bridge, Beikouqian, Xiaolinzi, Xingjiawopeng, and Tangmazhai hydrological  
295 stations. We automatically calibrated 10 sensitivity parameters, then we applied the SWAT  
296 manual calibration helper to make small and targeted adjustments to the calibration results to  
297 improve the simulation accuracy based on auto-calibration results. Various water quality and  
298 hydrologic parameters (test data) were adjusted under their change interval to fit with the  
299 monitored/observed data (Fig. 4). GWQMN, SURLAG, and ESCO were three key parameters  
300 in the calibration and water flow validation (Shen et al., 2010). The other sensitive parameters  
301 selected for calibration and validation in the HTRW are shown in Fig. 4. In the HTRW, the  
302 Liaoning Province government began monthly monitoring of pollutants in 2006. The TN and  
303 TP loading, and runoff data, used for calibration and validation were from 1992 to 2009 and  
304 from 2006 to 2008, respectively.



| Parameters          | Descriptions                                                                      |
|---------------------|-----------------------------------------------------------------------------------|
| CN2                 | Initial SCS Runoff curve number for moisture condition                            |
| ESCO                | Soil evaporation compensation factor                                              |
| GWQMN               | Threshold depth of water in shallow aquifer required for the return flow to occur |
| PRF                 | Peak rate adjustment factor for sediment routing in the main channel              |
| SPEXP               | Exponent parameter for calculating sediment entrained in channel sediment routing |
| ADJ_PKR             | Peak rate adjustment factor for sediment routing in sub basins                    |
| PPERCO              | P percolation coefficient                                                         |
| SOL_LABP            | Initial soluble P concentration in surface soil layer                             |
| NPERCO              | N percolation coefficient                                                         |
| SOL_NO <sub>3</sub> | Initial NO <sub>3</sub> concentration in the soil                                 |
| PSP                 | Phosphorus sorption coefficient                                                   |
| P_UPDIS             | P uptake distribution factor                                                      |
| PHOSKD              | P soil partitioning coefficient                                                   |
| SURLAG              | Surface runoff lag time                                                           |

  

| Sensitive parameters | Value                     |
|----------------------|---------------------------|
|                      | [25, 92], /, reduced by 5 |
|                      | [0.01, 1.00], 0.95, 0.19  |
|                      | [0, 5000], 0, 1200        |
|                      | [0, 2], 1, 1.97           |
|                      | [1, 1.5], 1, 1.45         |
|                      | [0.5, 2], 0.5, 2          |
|                      | [10, 17.5], 10, 17.5      |
|                      | [0, 100], 0, 12           |
|                      | [0, 1], 0.2, 0.8          |
|                      | [0, 100], 0, 20           |
|                      | [0.01, 0.7], 0.4, 0.6     |
|                      | [0, 100], 20, 80          |
|                      | [100, 200], 175, 175      |
|                      | [1, 24], 4, 4             |

Note: [Value bounds], Default value, Calibrated value

306 **Fig. 4.** Parameter values of SWAT model in the HTRW. Based on the spatial analysis of  
307 sensitive parameters, we analyzed the influencing factors of the parameter values combining  
308 with the underlying surface runoff factors of the basin.

309 In the present study, the simulated effects were evaluated by analyzing and comparing the  
310 runoff hydrograph,  $D_v$ ,  $E_{NS}$  and  $R^2$ . The  $D_v$  was used to simulate the entire water quantity  
311 deviation;  $E_{NS}$  and  $R^2$  were used to simulate the simulation effects (Nash, 1970). The  $D_v$ ,  $E_{NS}$   
312 and  $R^2$  were calculated as

$$313 \quad D_v = [(M - W) / W] \times 100\% \quad (2)$$

314 Here,  $D_v$  was the relative deviation;  $W$  was the observed mean value; and  $M$  was the predicted mean  
315 value.

$$316 \quad E_{NS} = 1 - \left[ \frac{\sum_{i=1}^n (W_i - M_i)^2}{\sum_{i=1}^n (W_i - \bar{W})^2} \right] \quad (3)$$

317 Here,  $E_{NS}$  was the Nash-Sutcliffe efficiency coefficient;  $W_i$  was the observed data at the  $i^{th}$   
318 period;  $M_i$  was the simulated data at the  $i^{th}$  period; and  $\bar{W}$  was the observed mean value.

$$319 \quad R^2 = \left\{ \left[ \frac{\sum_{i=1}^n (W_i - \bar{W})(M_i - \bar{M})}{\sqrt{\sum_{i=1}^n (W_i - \bar{W})^2} \sqrt{\sum_{i=1}^n (M_i - \bar{M})^2}} \right] \right\}^2 \quad (4)$$

320 Here,  $R^2$  was the certainty coefficient;  $W_i$  was the observed value at time  $i$ ;  $M_i$  was the simulated

321 value at time  $i$ ;  $\bar{W}$  was the observed mean value, and  $\bar{M}$  was the predicted mean value.

322 The first four years (1990-1994) were regarded as the stage for SWAT to minimize the  
323 uncertainty of initial meteorology and underlying surface values. Sensitivity analysis of the  
324 parameters is an effective mean to help assessing impact of uncertainty in the input and  
325 parameters on the output uncertainty. The sensitivity evaluation indicators differed between  
326 SWAT and SWAT-CUP. Student's t-test is used by SWAT-CUP and is part-sensitive. To  
327 improve the model calibration accuracy and verification results, we used SWAT-CUP and the  
328 SUFI-2 algorithm to analyse the parameters' sensitivity. To determine the sensitivity of various  
329 parameters, one parameter was auto-adjusted at a time based on the accuracy and change  
330 interval in Fig. 4. To calibrate the stream flow, we subsequently calibrated runoff and nutrients  
331 (TP and TN) with the same geographical and hydrological data. During calibration, we used  $R^2$   
332 and the correlation coefficient of the residual sequence ( $SCR$ ) to eliminate the uncertainties  
333 caused by the differences in water quality sampling and testing methods.

### 334 **3. Results and discussion**

#### 335 **3.1 Modelling validation**

336 **Stream flow.** Because of HTRW lacks basic runoff data, the present study focused on  
337 calibrating and testing the runoff model. First, we dealt with the meteorological data and  
338 retained the 1990-2001 data series, then supplied the meteorological data simulation value from  
339 1990 to 2001 by SWAT. Second, we input the runoff data for 1995-2001 into the SWAT-CUP  
340 model to calibrate the runoff parameters and entered these parameters into the SWAT database,  
341 then extended the meteorological data series to 1990-2009 and simulated runoff again. Finally,  
342 we compared the runoff simulation values with monitoring values from 2002 to 2009. During

343 annual calibration, the runoff curve data were calibrated and the available water content in the  
344 soil and the soil evaporation compensation coefficient were modified. Finally, the monthly  
345 runoff curve was modified. CN2 is a comprehensive parameter that reflects the watershed  
346 characteristics before rainfall and is mainly affected by the hydrology and soil types, land use,  
347 pre-soil moisture and tillage management measures. CN2 directly affects the surface runoff,  
348 and the larger the CN2 value, the larger the runoff yield. The same land-use type yields greater  
349 permeability with a smaller CN2 value or lower vegetation coverage and rainfall interception  
350 ability with a greater CN2 value. Different HRUs have different CN2 values. The moist area  
351 (climate division) has the highest CN2 ranging from 60~96, while other regions vary greatly.  
352 Within the same soil types, the CN2 value was the highest for cultivated land, followed by  
353 grassland. Woodland was the lowest. For the simulation, 1990-1994 was the model preparation  
354 period, 1995-2001 was the model calibration period, and 2002-2009 was the model validation  
355 period. **There are 6 samples of each site. Samples were obtained during the wet season, the wet  
356 season, intermediate season, and dry season. Two samples are set for each water period.**

357 For the calibration step,  $E_{NS}$  and  $R^2$  for Xingjiawopeng hydrological station and Tangmazhai  
358 hydrological station were both greater than 0.6, and the  $|D_v|$  values were less than 20% during  
359 the model preparation period, suggesting that the SWAT model parameters were reliable after  
360 calibration. The monitoring value fit better with the simulation value obtained from  
361 hydrographic curve. Most top values observed were highly similar. For the model calibration  
362 period, the matching curves for the simulated and measured monthly runoff values at  
363 Xingjiawopeng and Tangmazhai hydrological stations are shown in Figs. 5(a) and (b). The  
364 runoffs at these two hydrological stations were well matched. However, the accuracy of the  
365 simulated runoff for the second halves of the years 2002, 2005 and 2006 was poor, likely due

366 to the data series length and specific stations selected. For the simulation and evaluation  
 367 standards for the hydrological model, the simulation effects at the monthly scale were much  
 368 better.

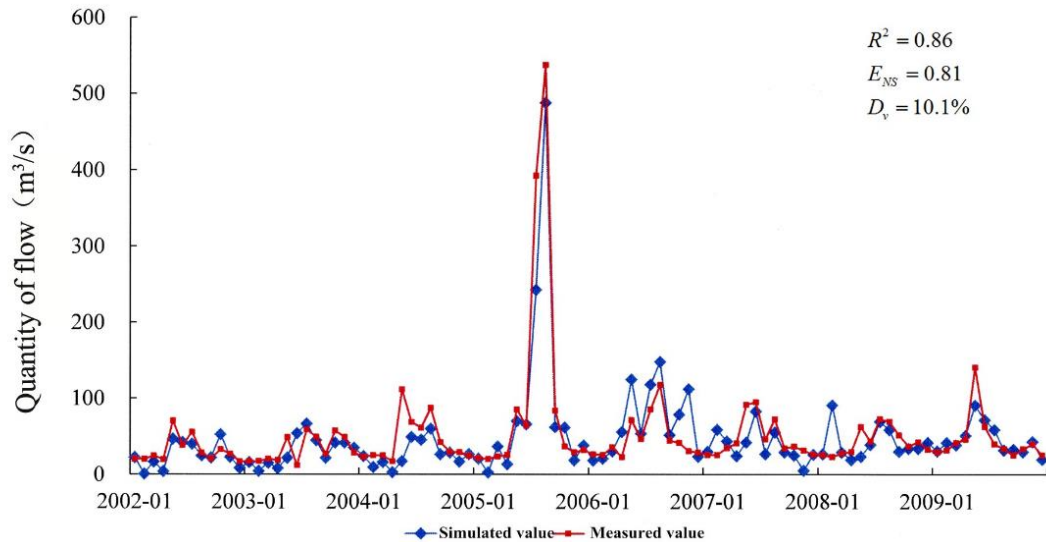

a. Xingjiawopeng station

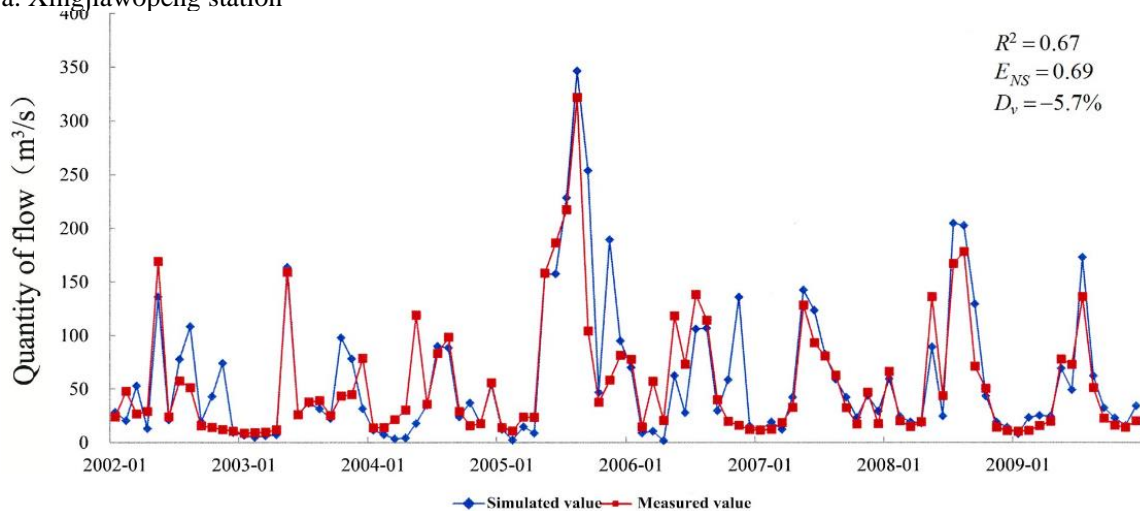

b. Tangmazhai station

369 **Fig. 5.** Stream flow validation of a typical monitoring station.

370 **Nutrients.** The nutrient concentrations in the water were simulated by SWAT. By verifying  
 371 the accuracy of the initial concentrations, the nitrate and soluble P loading can be simulated by  
 372 adjusting the nitrogen permeability coefficient (NPERCO) and the phosphorous permeability  
 373 coefficient (Lam et al., 2011). Beikouqian, Xingjiawopeng, Xiaolinzi and Tangmazhai

374 hydrological stations had continuous monthly water quality monitoring data from 2006 to 2007  
 375 (model calibration period). Only the monthly data on TN and TP in Beikouqian were validated  
 376 from 2008 to 2009. The Xingjiawopeng, Xiaolinzi and Tangmazhai Hydrological stations had  
 377 only the TN data during the study period; therefore, Beikouqian was selected for the validation  
 378 curves, and the TN  $E_{NS}$  and  $R^2$  were 0.64 and 0.78, and the TP  $E_{NS}$  and  $R^2$  were 0.60 and 0.75,  
 379 respectively (Figs. 6 a and b). The  $E_{NS}$  and  $R^2$  for the Xingjiawopeng, Xiaolinzi and Tangmazhai  
 380 hydrological stations were 0.62 and 0.73, 0.61 and 0.72, and 0.62 and 0.77, respectively. The  
 381 values of all  $R^2$  were higher than 0.7, confirming that the SWAT could be used for water quality  
 382 simulation in HTRW. **The simulated TN and TP have a certain synchronization with the**  
 383 **measured changes of TN and TP in each month. The variation law of simulated N and P content**  
 384 **is not much different from the measured value, and the model has good workability.**

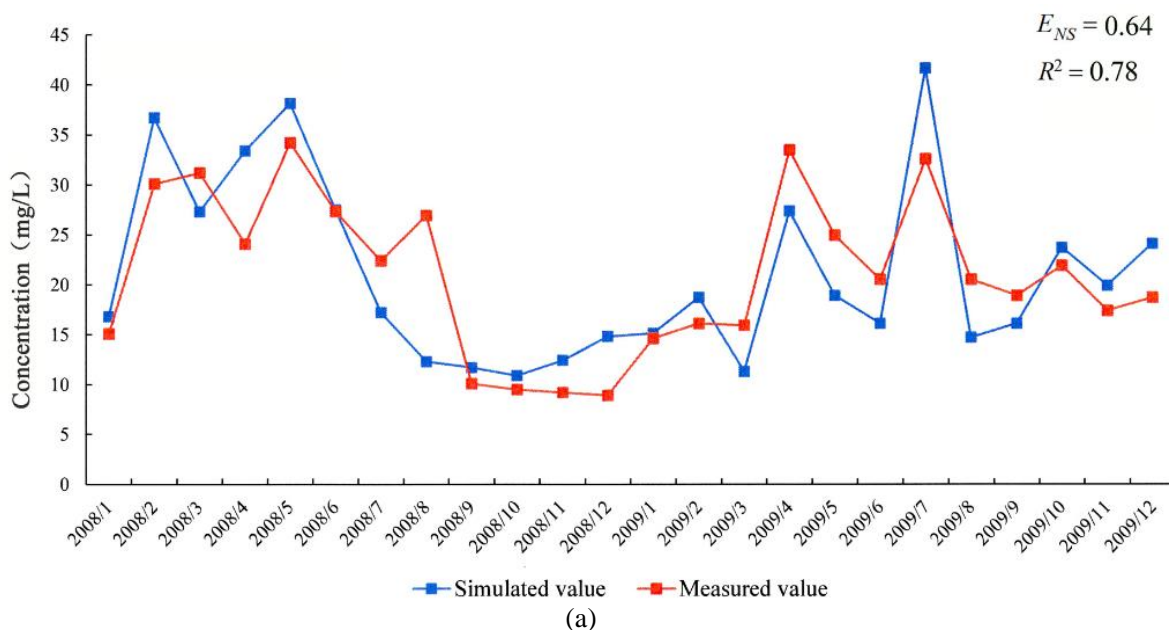

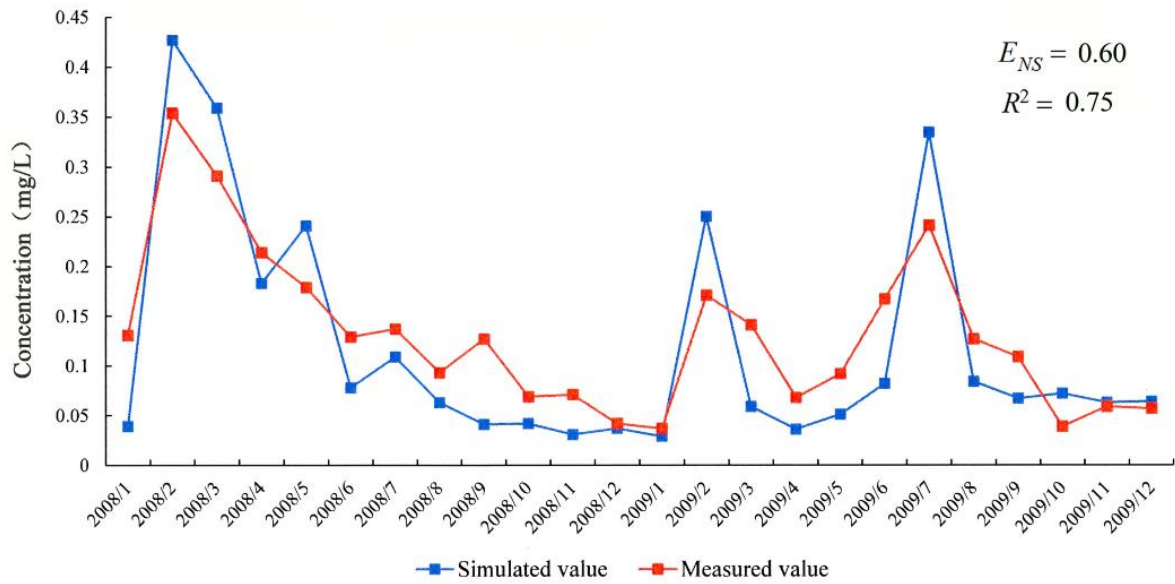

(b)

385 **Fig. 6.** Nutrient validation at Beikouqian station. Figure (a) and (b) shows the fitting result of  
 386 TN and TP, respectively.

### 387 **3.2 NPS pollutant loading under the status quo scenario**

388 The NPS pollutant generation output was calculated using the pollutant loading approach  
 389 based on the attributes of the regional calculation results and land-use scenarios in HTRW.  
 390 The generated N and P for different calculation units were calculated based on the spatial  
 391 changes in soil types, crops and residuals, as well as the differences in the coefficients of N and  
 392 P losses under different land uses. The paddy fields, rural residential areas, urban development,  
 393 and vegetation type may be important indicators for variability in NPS pollution, and nutrition  
 394 pollution was influenced by the integrated effects of different land uses (Cai et al., 2015; Lee et  
 395 al.,2010). The annual generated TN and TP were 18,707 t and 53,322 t, respectively (Table  
 396 1). Brown soil is widely distributed in the HTRW. We supplied the N and P loss  
 397 characteristics under different land-use types and fertilization, as shown in Table 2 (Hao,  
 398 2012). The brown soil thickness was 30-50 cm in HTRW. The organic content, TN and TP

399 decreased significantly with the soil depth increment. Nutrients were mainly found in soils  
 400 of 0-30 cm deep, where TN and TP reserves reached more than 50% of the total soil reserves.  
 401 Large-scale use of fertilizers (DAP, N:46.4% and N-P-K, N:15%; P<sub>2</sub>O<sub>5</sub>:15%; K<sub>2</sub>O:15%) and  
 402 livestock and poultry excrement (N:0.5-0.6%; P:0.45-0.6%; K:0.35-0.5%) were the important  
 403 sources of agricultural NPS pollution. In HTRW, the number of pastures and cattle was small,  
 404 and cattle excrement was collected and processed by the farmer. The excessive or unreasonable  
 405 application of fertilizers and the fertilizer utilization rate were not high (the utilization rate of  
 406 nitrogen is 30% to 60% and of phosphorus is 2% to 25%), resulting in substantial fertilizer loss.  
 407 The nutrient content (mainly from agricultural production activities) of the soil (20cm below  
 408 the surface) in the HTRW was 1.21 t/ha. Information on initial soil nutrient content and  
 409 fertilizers was used for model parameterization.

410 **Table 1.** Pollutant generation in the HTRW under the status quo scenario

| Watershed     | Area<br>(km <sup>2</sup> ) | Run off<br>(E+08 m <sup>3</sup> ) | Pollutant (t) |        |        | Pollutant loading<br>(kg/ha) |    |    |
|---------------|----------------------------|-----------------------------------|---------------|--------|--------|------------------------------|----|----|
|               |                            |                                   | Sediment      | TP     | TN     | Sediment                     | TP | TN |
| Hunhe River   | 11,565                     | 24.04                             | 220,004       | 8,993  | 24,264 | 190                          | 8  | 21 |
| Taizi River   | 13,903                     | 33.31                             | 1,699,996     | 6,399  | 19,010 | 1,223                        | 5  | 14 |
| Daliao River  | 1,913                      | 1.60                              | 300,002       | 3,315  | 10,048 | 1,568                        | 17 | 53 |
| Total/Average | 27,381                     | 58.95                             | 2,220,002     | 18,707 | 53,322 | 811                          | 7  | 19 |

411 Source: China Hydrology; national earth system data sharing infrastructure; field investigation of Liaoning  
 412 province; chemical fertilizer/land area/soil erosion statistics yearbook of Liaoning province; Liaoning  
 413 province Bureau of Meteorology.

414 **Table 2.** Loss characteristics of N and P under different land uses and fertilization

| Land use            | Soil<br>thickness<br>(cm) | Organic<br>matter<br>content<br>(g/kg) | Unit weight<br>of soil<br>(g/cm <sup>3</sup> ) | Soil particle composition (mm) |                       |                   | TN<br>(g/kg) | TP<br>(g/kg) |
|---------------------|---------------------------|----------------------------------------|------------------------------------------------|--------------------------------|-----------------------|-------------------|--------------|--------------|
|                     |                           |                                        |                                                | Clay<br>ø≤0.002                | Loam<br>0.002<ø≤0.005 | Sand<br>0.005<ø≤2 |              |              |
| Cultivated<br>field | 0-5                       | 24.58                                  | 1.42                                           | 21.05                          | 57.35                 | 21.6              | 0.96         | 0.47         |
|                     | 5-30                      | 18.45                                  | 1.48                                           | 24.71                          | 24.71                 | 18.84             | 0.88         | 0.38         |
| Grassland           | 0-5                       | 27.6                                   | 1.18                                           | 15.97                          | 15.97                 | 14.58             | 1.25         | 0.58         |

415 **3.2.1. Sediment**

416 Sediment loading is the data basis for calculating TN and TP loading and is affected by the  
417 type of land development and vegetation coverage (generally dominated by forest and  
418 farmland). Based on the SWAT model simulation, the annual sediment outputs generated in the  
419 Hunhe, Taizi and Daliao River watersheds were  $22 \times 10^4$  t,  $170 \times 10^4$  t and  $30 \times 10^4$  t, respectively.  
420 The annual soil erosion loading in HTRW was 0.811 t/ha, and its spatial distribution is shown  
421 in Fig. 7(a). The soil erosion value varied widely in different regions, with the change interval  
422 from 0 to 2 t/ha. Soil erosion in the Daliao River watershed was severe (up to 2 t/ha in some  
423 regions), followed by the Taizi River watershed (1 t/ha in most regions) and the Hunhe River  
424 watershed (less than 0.2 t/ha in most regions). Yingkou and Dashiqiao have even topography,  
425 and incoming silt from the upper areas is accumulated therein. The soil erosion modulus is  
426 therefore very high, which contributes greatly to the silt input to the HTRW. The soil erosion  
427 was affected by natural and human factors. The natural factors mainly included topography,  
428 underlying surface conditions and soil type. The human factors mainly consisted of vegetation  
429 coverage, precipitation, land use, crop cultivation and cultivated land farming methods.  
430 Moreover, mountainous areas have great soil erosion (Hong et al.,2012). The Daliao River had  
431 a large cultivated land area; therefore, soil erosion was more likely. Soil types are also key  
432 influencing factors in causing soil erosion; therefore, brown and paddy soils are prone to  
433 accumulating sediment (Hong et al.,2012).

434 **3.2.2. TP**

435 From the SWAT simulation results, the annual TP output generated in the Hunhe, Taizi and  
436 Daliao River watersheds was 8993 t, 6399 t and 3315 t, respectively, and the HTRW output



437 loading was 7 kg/ha. The TP loading had the same spatial distribution pattern as the sediment  
438 loading, ranging from 0 to 260 kg/ha. Fig. 7(b) shows the TP spatial variation loading of the  
439 HTRW. A large amount of P could be deposited in the downstream plain. The changes in the  
440 TP loading were affected by topography, precipitation, land use, and silt losses. The TP output  
441 loading on the Daliao River watershed slope was higher than that of the Hunhe River watershed,  
442 while the Taizi River watershed was the lowest. Many fertilizers and pesticides have been  
443 applied to the farmland, and organophosphate pesticides accounted for 40% of the total  
444 pesticides (Wang, 2012). The paddy fields, brown soil and dry lands were mainly distributed in  
445 the Hunhe River downstream. Therefore, the P loading in these plains areas was higher (Li et  
446 al., 2010). Correspondingly, the cities and counties with large proportions of farmland have  
447 higher TP output loading, such as Dashiqiao, Panshan and Dawa city in the Daliao River  
448 watershed and the city of Haicheng and Taian county in the Hunhe River watershed. Regions  
449 with large proportions of developed land have lower TP output loading, including the city centre  
450 of Fushun, Shenyang in the Hunhe River watershed, the municipal districts of Liaoyang city  
451 and Benxi city at the Taizi River watershed. Based on land use, tributaries with higher  
452 proportions of farmland have the highest TP output loading, while tributaries with substantial  
453 vegetation cover as forested land have relatively lower TP output loading. TP output loading is  
454 closely related to soil characteristics and attributes. **The buffer zone was only 1km wide and the  
455 vegetation on both sides of the river grew slowly. HTRW is located in the northeastern of China  
456 and which has long and cold winter. From October to April, the vegetation in the buffer zone  
457 is almost withered. Therefore, the average removal rate of the buffer zone to TP is 10%.  
458 Although the data is not high, it reflects the impact of regional and climatic conditions on TP  
459 removal.**

### 460 3.2.3. TN

461 Simulation and calculation results showed that the TN generation output in the Hunhe, Taizi  
462 and Daliao River watersheds was 24264 t, 19010 t and 10048 t. The annual TN output loading  
463 in the watershed was 19 kg/ha. Fig. 7(c) shows the spatial variation of TN loading in the HTRW.  
464 The TN loading interval varied from 0.001 to 365 kg/ha. The TN loading had the same spatial  
465 characteristics as TP loading. The TN output loading in the Daliao River watershed was greater  
466 than that in the Hunhe River watershed, while the Taizi River watershed was the lowest. Large  
467 amounts of fertilizer were applied in the study area. Nitrate and organic N accounted for a  
468 substantial portion of the fertilizer used in HTRW. Therefore, the TN output loading in the  
469 watershed was very high. Regions with much farmland, such as the middle and lower portions  
470 of the Hunhe River, the lower portions of the Taizi River and the tributaries in the upper portions  
471 of the Daliao River, have high TN output loading. The organic N contents in the forested land  
472 were very low. Thus, the output loading of TN in regions with high vegetation forest cover,  
473 such as the mountainous areas in the upper parts of the Taizi and Hunhe rivers, was very low.  
474 The TN output loading in municipal districts with highly developed areas was the lowest, such  
475 as in the municipal districts of Fushun city and Shenyang city in the Hunhe River watershed  
476 and the municipal districts of Benxi city, Liaoyang city and Shenyang city in the Taizi River  
477 watershed.

478 TN and TP loading in the HTRW were characterized by a regional distribution. Although  
479 Qingyuan, Yibin and Benxi counties, located in the upper areas of the HTRW, had high water  
480 and silt output, their pollutant loading was low. Per unit area, the maximum TN and TP loading  
481 (maximized over space) was 365 and 260 kg/ha, respectively. The regions TN and TP with high  
482 loading were mainly distributed in Taian, Haicheng, and Fushun city. The TP and TN loading

483 near the Dahuofang, Tanghe, Shenwo and Tanghe reservoirs were low, ranging from 0.006 to  
484 10 kg/ha and from 0.08 to 19 kg/ha, respectively. Based on topography and soil distribution,  
485 the slope is very steep in the upper stream of HTRW. The soils are predominately brown soil  
486 and salted paddy soil, both of which are easily eroded. The topography in the lower sections is  
487 usually flat, such as in the cities of Anshan, Haicheng, Yingkou and Panjin. The elevation is  
488 low, and the soil is predominately meadow soil and brown soil, both of which have higher soil  
489 erosion rates, silt loss and output loading of pollutants. The regions with heavy TN and TP  
490 loading included Xinmin county, located in the middle and lower reaches of the HTRW, the  
491 municipal district of Shenyang city, Liaozhong county, Dengta city, Liaoyang county, the  
492 municipal district of Anshan city, Haicheng city and a portion of Dashiqiao city. Based on the  
493 land development pattern in the Taizi River, dry fields and paddy fields were mainly distributed  
494 on the plain areas of this watershed, which constitute therefore a core source of output loading.  
495 The spatial differences in the TN and TP loading were no large differences. Based on  
496 topography, landform, soil types and land development status in the watershed, the upper  
497 streams of the watershed have high vegetation coverage, less farmland and low pollutant  
498 loading, while the lower areas have more farmland, high fertilizer application rates and high  
499 soil erosion and pollution loading (Yin et al.,2011). In summary, the spatial characteristics of  
500 TN loading resulted from comprehensive effects of precipitation/runoff characteristics, soil  
501 properties, soil erosion and vegetation coverage. Therefore, to effectively control TN loading  
502 and soil erosion in the HTRW, the BMPs, fallow measures of cultivated fields, watershed  
503 vegetation restoration and soil and water conservation in the upper stream are the most  
504 important measures to implement.

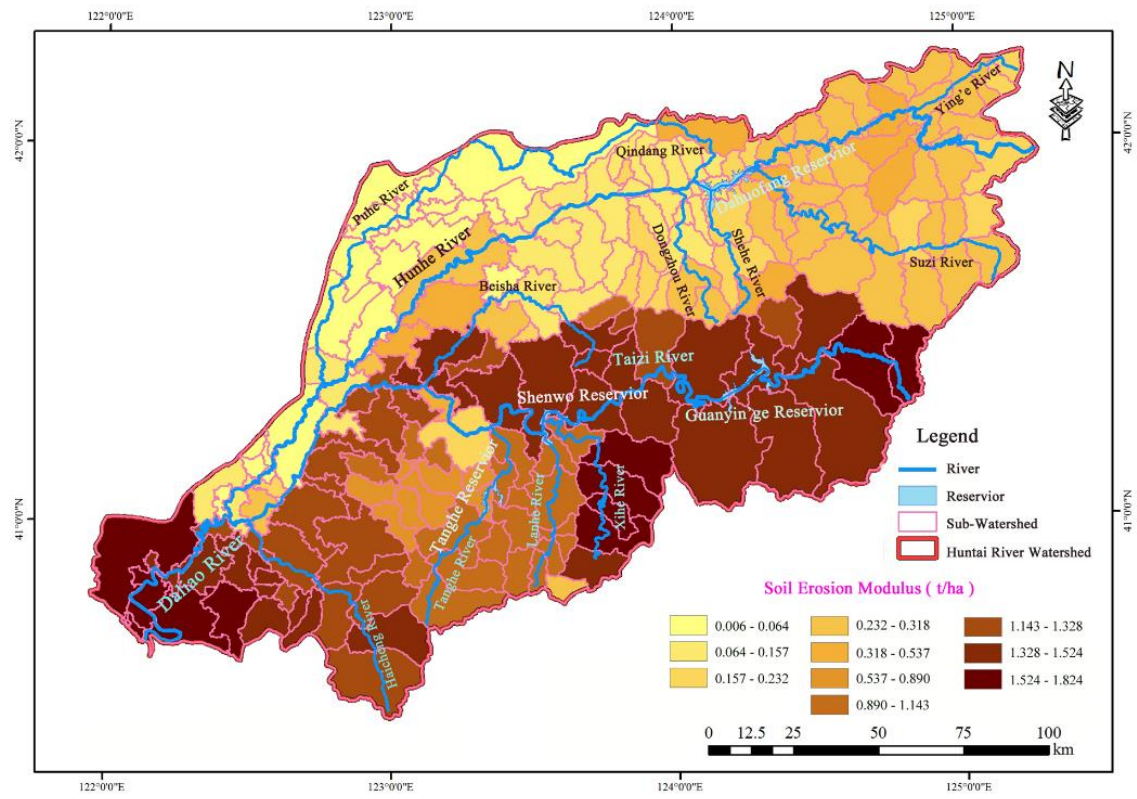

(a)

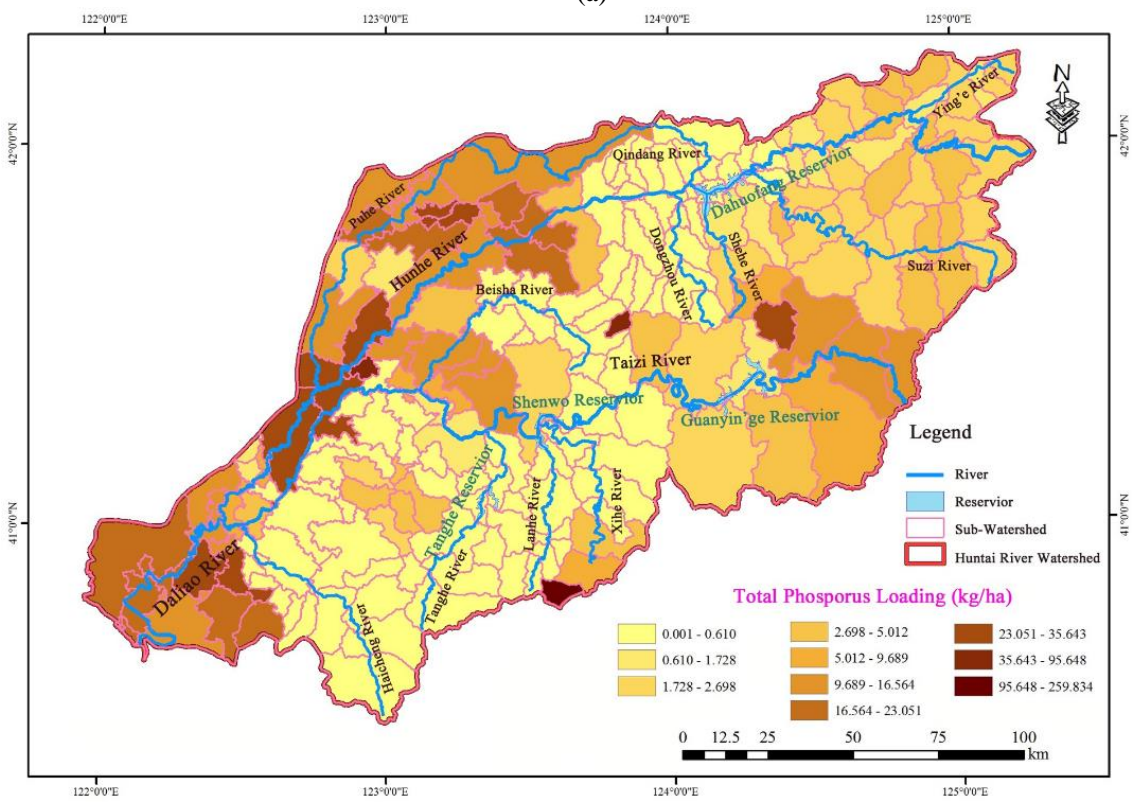

(b)

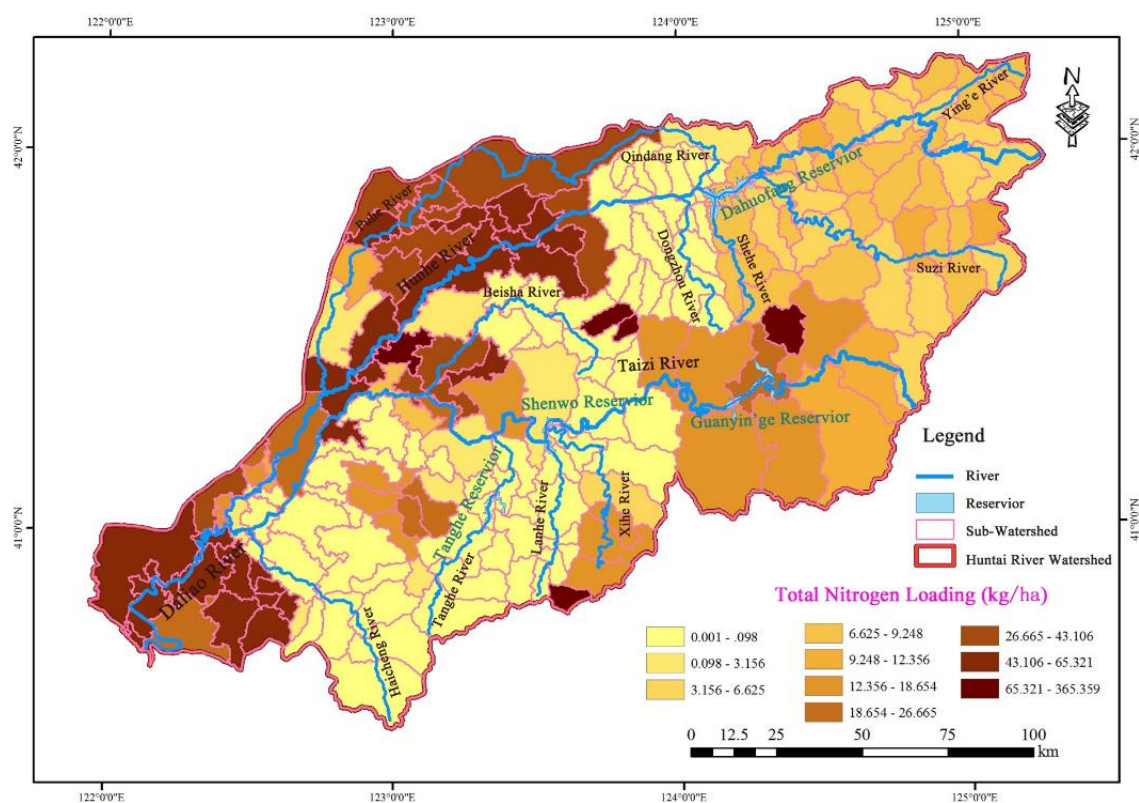

505 **Fig. 7.** NPS pollution loading distributions of HTRW under the status quo scenario. The Figure  
 506 (a), (b) and (c) showed the loading distributions of contaminant sediment, TN and TP,  
 507 respectively.

### 508 3.3 NPS pollutant loading under EPS

509 There exists a correlation between land development mode and water environment  
 510 protection and rehabilitation at the basin scale. The riparian buffer zones effectively reduced  
 511 the concentration levels of  $\text{NO}_3^-$  in the water, which were 47% lower than those of the soil  
 512 content. Dry farmland caused higher NPS pollutant loading, followed by paddy lands, rural  
 513 and urban areas, forestland, and shrub lands. Hence, under the EPS, the farmland area in the  
 514 watershed was reduced. A modest area of farmland (29,500 ha, accounting for 3% of the total  
 515 farmland area) was converted to forestland (including shrub land, 14,753 ha; grassland, 5,899  
 516 ha; and wetland, 8,848 ha), while NPS pollution from farmland decreased. The water quality

517 protection objective within the watershed’s critical zoning was realized. The riparian buffers  
 518 can be planted in various diverse vegetations. The N removal rate of a 60-m-wide woody soil  
 519 buffer zone was 16% and 38% higher than that of shrubbery and grassland, respectively.  
 520 Approximately 1 kilometre within both banks of the Hunhe, Taizi and Daliao river tributaries  
 521 and 5 kilometres of surrounding reservoirs buffer zones were defined, including 1946 km<sup>2</sup> of  
 522 farmland, urban land, and rural residential land. This accounts for 7% of the total area in the  
 523 watershed. The woodland coverage rate was reduced by 1%, and the loading of sediment, TP and  
 524 TN increased by 0.01-11, 0.2-3 and 0.4-14 kg/km<sup>2</sup>, respectively. The pollutant generation output  
 525 under EPS was calculated by transforming the existing land-use type.

526 The TN and TP respective ranges of change were 0 to 365 kg/ha and 0 to 260 kg/ha. The  
 527 annual losses of TN and TP were reduced by 13,839 and 1,946 t/yr., respectively. In comparison,  
 528 the NPS pollutant generation output under the EPS was decreased by 22% compared with that  
 529 under the SQS, whereas the TP and TN outputs were reduced by 10% and 26%, respectively.  
 530 Under the EPS, the average loading of TN and TP was 14 and 6 kg/ha on a unit area basis,  
 531 which were 14% and 26% less than the loading under the SQS, respectively. The NPS pollutant  
 532 loading declined in the EPS. The variation of TP and TN pollutant loading between the SQS  
 533 and EPS is shown in Table 3. The amount of change indicated that riparian buffer and land  
 534 development pattern change effectively reduced NPS pollutant loading in the HTRW.

535 **Table 3.** Loading variation in TP and TN pollutant between EPS and the status quo scenario

| Watershed     | Pollutant loading of EPS (kg/ha) |    | Pollutant loading variation (kg/ha) |     | Farmland variation (ha) | Forestland variation (ha) | Grassland variation (ha) | Wetland variation (ha) | Pollutant annual variation(t/yr.) |         |
|---------------|----------------------------------|----|-------------------------------------|-----|-------------------------|---------------------------|--------------------------|------------------------|-----------------------------------|---------|
|               | TP                               | TN | TP                                  | TN  |                         |                           |                          |                        | TP                                | TN      |
| Hunhe River   | 7                                | 16 | -1                                  | -5  | -12,460                 | +6,231                    | +2,492                   | +3,737                 | -838                              | -5,743  |
| Taizi River   | 4                                | 10 | -1                                  | -4  | -14,979                 | +7,491                    | +2,995                   | +4,493                 | -776                              | -5,606  |
| Daliao River  | 16                               | 40 | -1                                  | -13 | -2,061                  | +1,031                    | +412                     | +618                   | -332                              | -2,490  |
| Total/Average | 6                                | 14 | -1                                  | -5  | -29,500                 | +14,753                   | +5,899                   | +8,848                 | -1,946                            | -13,839 |

536 “—” denotes a decrease compared to that of the status quo scenario; “+” denotes an increase compared to

537 that of the status quo scenario.

### 538 **3.4 Value transformation based on NPS pollutant loading**

539 Based on the results of Simpson (2014), the correlation between the yield, input of land,  
540 purchase investment, ecosystem services value, and land area is expressed as

$$541 \quad q = f(x, S, A) \quad (6)$$

542 where  $q$  is the yield,  $x$  is the quantity of the purchase investment,  $S$  is the quantity of the  
543 supplied ecosystem services,  $A$  is the land area directly utilized for agricultural production.

544 Formula (6) is a conceptual formula, and there is no sole unit for each letter in formula (6).

545 To obtain a general expression, we give a special instance of production function.

$$546 \quad q = f(x, S, A) = x^\alpha S^{1-\alpha} - \gamma(x^\alpha S^{1-\alpha})^2 / A \quad (7)$$

547 Where  $\alpha=1/2$ ,  $\gamma$  was a positive constant.

548 The constant profit of a massive production function is expressed as (Vincent & Binkley,  
549 1993)

$$550 \quad q = \sqrt{x \cdot S} - \gamma \cdot x \cdot S / A \quad (8)$$

551 This is a simple production function with limitations. Assuming that  $r$  represents the price of  
552 the input. When the price of the yield is normalized as 1, the profit  $\eta$  is expressed as

$$553 \quad \eta = \sqrt{x \cdot S} - \gamma \cdot x \cdot S / A - r \cdot x \quad (9)$$

554 For  $x$ , the first-order condition for maximal profit is expressed as

$$555 \quad \begin{cases} \frac{1}{2} \sqrt{S/x} - \gamma \cdot S / A - r = 0 \\ -\frac{\varphi}{2} \sqrt{x/S} + \gamma \cdot x \cdot \frac{\varphi \cdot \bar{A}}{A^2} = 0 \end{cases} \quad (10)$$

556 and when the first-order of Eq. (10) is satisfied, the second-order condition for maximal  
557 management was also satisfied. After the conversion, we obtained

558 
$$x = \frac{S}{4(\gamma \cdot S / A + r)^2} \quad A = \frac{\bar{A}}{1 + \sqrt{r / \gamma \cdot \varphi}} \quad (11)$$

559 The ecosystem services of the preserved land were determined by the parameter,  $\varphi$ . In the  
 560 production function, ecosystem services and the purchase investment were the substitute items.  
 561 When the purchase price increases, the area of the land used for production will decrease,  
 562 suggesting that more land should be preserved. When more land is preserved for maximal profit,  
 563 the yield will decrease. When Eq. (10) was multiplied by  $x$ , we obtained

564 
$$\frac{1}{2} \sqrt{x \cdot S} - \gamma \cdot x \cdot S / A - r \cdot x = \eta - \frac{1}{2} \sqrt{x \cdot S} = 0 \quad (12)$$

565 where the total differential of Eq. (12) was calculated concerning  $A$ . If  $A$  and  $x$  were used to  
 566 realize maximal profits, the arithmetic resolution could be calculated as

567 
$$\frac{dx/x}{dA/A} = \frac{A}{A-A} \quad (13)$$

568 therefore, when most of the land was used for production, the dependence on the purchase  
 569 investment increased. If more land was used in agricultural production activities, greater costs  
 570 would be paid to compensate for lost ecosystem services. If the initial consideration was the  
 571 excessive dependence on purchase investments, the margin rate of technically replacing the  
 572 purchase investment by ecosystem services increased, indicating that the purchase investment  
 573 would be reduced significantly.

574 If the land area used for agricultural production was changed, profits ( $\partial q / \partial x = r$ ) were  
 575 maximized by

576 
$$\frac{dq/q}{dA/A} = \frac{r \cdot x}{q} \frac{A}{A-A} \quad (14)$$

577 If the agricultural production was dependent on the purchase investment in the current  
 578 watershed to a greater degree, a significant yield reduction would occur.



579 The total value of the water and soil conservation, material investment, and service  
580 investment was calculated using the energy price per unit of land area in the river basin as a  
581 reference (Fu et al., 2017). The agricultural production investment value in HTRW was  
582 calculated indirectly by the equivalent conversion between the investment and the acquired  
583 value. The cost investment for agricultural production in HTRW was ¥ 217.13 E+08  
584 (USD\$ 34.12 E+08) (Table 4).

585 **Table 4.** Energy prices of agricultural production in HTRW (based on status quo scenario).

| Classification                 | Details                       | Energy value<br>(Sej/ha) | Price of energy<br>(¥/ha) | Total values<br>(¥ E+08) | Cost investment<br>(¥ E+08) |
|--------------------------------|-------------------------------|--------------------------|---------------------------|--------------------------|-----------------------------|
| Water and soil<br>conservation | Soil erosion                  | 3.08E+14                 | 594.53                    | 6.40                     | 6.40                        |
|                                | Depreciation                  | 3.05E+15                 | 1,960.34                  | 21.10                    | 21.10                       |
| Material<br>investment         | Fuel oil                      | 2.90E+13                 | 18.64                     | 0.20                     | 0.20                        |
|                                | Material                      | 1.42E+16                 | 9,126.83                  | 98.23                    | 98.23                       |
|                                | Labour                        | 1.29E+16                 | 8,291.28                  | 89.24                    | 89.24                       |
| Service<br>investment          | Maintenance and<br>management | 2.51E+14                 | 161.33                    | 1.74                     | 1.74                        |
|                                | Service                       | 3.30E+13                 | 21.21                     | 0.23                     | 0.23                        |
| <i>Total</i>                   |                               |                          |                           | 217.13                   | 217.13                      |

586 To calculate the elasticity of the farmland yield data derived from Eq. (13), the expression  
587 was used as follows:

$$588 \left(\frac{dq}{q}\right) / \left(\frac{dA}{A}\right) = \left(\frac{217.13E+08}{3800E+08}\right) / \left(\frac{29500}{1076300}\right) = 2. \quad (15)$$

589 Here,  $dq$  was the farmland production cost after deducting the paid amount,  $q$  was the  
590 agricultural production value of the farmland,  $dA$  was the total reduced area of the farmland  
591 under EPS, and  $A$  was the total area of the farmland. We obtained the agricultural production  
592 value from Liaoning Province statistical yearbooks-2013.

593 Based on this calculation, to maximize profit, 1% of the currently cultivated or used land in  
594 HTRW was converted into preserved land to supply more ecosystem services. Accordingly, the  
595 crop yield in HTRW was reduced by 2%. The analysis results based on the ecological land-use  
596 value in HTRW, the forestland, grassland, and wetlands were the main suppliers of ecosystem

597 services. Therefore, the decreased farmland and increased the ecological value of the non-  
598 cultivated land were profit indicators.

## 599 **4. Conclusions**

600 NPS pollution often occurs on dry farmlands and in paddy, rural and urban areas. Many  
601 studies have applied the SWAT model to study NPS in China, mainly focusing on scenario  
602 simulations of NPS pollution and management in agricultural areas with rich hydrological and  
603 meteorological data. Basic monitoring data on HTRW were deficient. Thus, we selected SWAT  
604 as a feasible method for assessing NPS pollutant loading at the watershed level. We applied  
605 specific practices based on EPS to reduce NPS pollutant loading in the Hunhe, Taizi and Daliao  
606 River watersheds. The status quo scenario and EPS were used to calculate the NPS pollutant  
607 generation output. NPS pollutant generation output and TN and TP loading were reduced by  
608 22%, 26% and 10% compared with that of the SQS, respectively. The crop yield was reduced  
609 by 2% when the land area for ecosystem services in the basin increased by 1%.

610 The SWAT model can calculate the potential reduction of agricultural NPS pollutants based  
611 on different land uses. The reliability of SWAT evaluation results are decided by information  
612 completeness and the reasonable degree of parameter initialization. To determine pollutant  
613 reduction under different land development patterns and examine the uncertainty of  
614 sensitivity parameters, the SWAT model in China has many potential applications.  
615 Considering the significance of ecosystem services, much attention should be paid to the  
616 relationship between ecosystem service increases and crop yield decreases. Only in this way  
617 can ecosystem services and land use be harmoniously developed.

## 618 **Acknowledgements**

619 The study was financially supported by National Key R&D Program of China  
620 (2016YFC0401408), Comprehensive Regulation Theory and Application of Basin Water  
621 Environment Process (WE0145B532017), and Project Based Personnel Exchange Program  
622 with China Scholarship Council & German Academic Exchange Service of 2015.

## 623 **References**

- 624 Abbaspour, K.C., Yang, J., Maximov, I., Siber, R., Bogner, K.: Modelling hydrology and water quality in the  
625 pre-alpine/alpine Thur watershed using SWAT, *J. Hydrol.*, 333, 413-430, 2007.
- 626 Ahearn, D.S., Sheibley, R.W., Dahlgren, R.A.: Land use and land cover influence on water quality in the last  
627 free flowing river draining the western Sierra Nevada, California, *J. Hydrol.*, 313, 234-247, 2005.
- 628 Arnold, J., Allen, P.: Automated Methods for Estimating Baseflow and Ground Water Recharge from  
629 Streamflow Records. *Journal of the American Water Resources Association*, 35, 411-424, 1999.
- 630 Arnold, J.G., Srinivasan, R., Mutiah, R.S.: Large area hydrologic modelling and assessment. Part I: Model  
631 development, *Journal of the American Water Resources Association*, 34, 73-89, 1998.
- 632 Cai, Y., Zhao, D.H., Xu, D.L., Jiang, H., Yu, M.Q.: Influences of Land Use on Sediment Pollution across  
633 Multiple Spatial Scales in Taihu Basin, *Clean-Soil, Air, Water*, 43, 1616-1622, 2015.
- 634 Department of Environmental Protection of Liaoning Province: Liaoning Province Environmental Bulletin,  
635 2011.
- 636 Ficklin, D.L., Luo, Y.Z., Luedeling, E., Zhang, M.H.: Climate change sensitivity assessment of a highly  
637 agricultural watershed using SWAT, *J. Hydrol.*, 374, 16-29, 2009.
- 638 Fu, Y.C., Du, X., Ruan, B.Q., Liu, L.S., Zhang, J. Agro-ecological compensation of watershed based on  
639 emergy. *Water Science & Technology*, 76, 2830-2841. 2017.
- 640 Gassman, P.W., Reyes, M.R., Green, C.H., Arnold, J.G.: The Soil and Water Assessment Tool: Historical  
641 development, applications and future directions, *Trans ASABE*, 50, 1211-1250, 2007.
- 642 Gosain, A.K., Rao, S., Srinivasan, R.: Return-flow assessment for irrigation command in the Palleru River  
643 Basin using SWAT model, *Hydrol Process*, 19, 673-682, 2005.
- 644 Hao, L.P.: Characteristics of nitrogen and phosphorus losses of rainfall runoff in Liaoning Hunhe Basin,  
645 Shenyang Agricultural University, 2012.
- 646 Hong, Q., Sun, Z., Chen, L., Liu, R., Shen, Z.: Small-scale watershed extended method for nonpoint source  
647 pollution estimation in part of the Three Gorges Reservoir Region, *Int J Environ Sci Technol.*, 9, 595-  
648 604, 2012.

649 Lam, Q.D., Schmalz, B., Fohrer, N.: The impact of agricultural Best Management Practices on water quality  
650 in a North German lowland catchment, *Environ Monit Assess*, 183, 351-379, 2011.

651 Lee, M.S., Park, G.A., Park, M.J.: Evaluation of non-point source pollution reduction by applying Best  
652 Management Practices using a SWAT model and Quick Bird high resolution satellite imagery, *Journal*  
653 *of Environmental Sciences*, 22, 826-833, 2010.

654 Li, M., Zhu, B., Hou, Y.L.: Phosphorus release risk on a calcareous purple soil in southwest China, *Int J*  
655 *Environ Pollut.*, 40, 351-362, 2007.

656 Liu, M., Li, C.L., Hu, Y.M., Sun, F.Y.: Combining CLUE-S and SWAT Models to Forecast Land Use Change  
657 and Non-Point Source Pollution Impact at a Watershed Scale in Liaoning Province, China. *Chin. Geogra.*  
658 *Sci.*, 24, 540-550, 2014.

659 Logsdon, R.A., Chaubey, I.: A quantitative approach to evaluating ecosystem services, *Ecological Modelling*,  
660 257, 57-65, 2013.

661 Nash, J.E., Sutcliffe, J.V.: River flow forecasting through conceptual models part I-A discussion of principles,  
662 *J Hydrol.*,10, 282-290,1970.

663 Niraula, R., Kalin, L., Srivastava, P., Anderson, C.J.: Identifying critical source areas of nonpoint source  
664 pollution with SWAT and GWLF, *Ecological Modelling*, 268, 123-133, 2013.

665 Outram, F.N., Cooper, R.J., S`unnenberg, G., Hiscock, K.M., Lovett, A.A.: Antecedent conditions,  
666 hydrological connectivity and anthropogenic inputs: factors affecting nitrate and phosphorus transfers  
667 to agricultural headwater streams, *Sci Total Environ.*, 545, 184-199, 2016.

668 Ouyang, W., Huang, H., Hao, F.: Synergistic impacts of land-use change and soil property variation on non-  
669 point source nitrogen pollution in a freeze-thaw area, *J. Hydrol.*, 495, 126-134, 2013.

670 Ouyang, W., Wang, X., Hao, F.: Temporal-spatial dynamics of vegetation variation on non-point source  
671 nutrient pollution, *Ecological Modelling*, 220, 2702-2713, 2009.

672 Robinson, T.H., Leydecker, A., Keller, A.A.: Steps towards modeling nutrient export in coastal Californian  
673 streams with a Mediterranean climate, *Agricultural Water Management*, 77, 144-158, 2005.

674 Sadeghi, S.H.R., Jalili, K., Nikkami, D.: Land use optimization in watershed scale, *Land Use Policy*, 26, 186-  
675 193, 2009.

676 Shen, Z.Y., Chen, L., Hong, Q.b., Qiu, J.L.: Assessment of nitrogen and phosphorus loads and causal factors  
677 from different land use and soil types in the Three Gorges Reservoir Area, *Sci Total Environ.*, 454, 383-  
678 392, 2013.

679 Shen, Z.Y., Hong, Q., Yu, H., Niu, J.F.: Parameter uncertainty analysis of non-point source pollution from  
680 different land use type, *Sci Total Environ.*, 408, 1971-1978, 2010.

681 Shen, Z.Y., Liao, Q., Hong, Q., Gong, Y.W.: An overview of research on agricultural non-point sources  
682 pollution modelling in China, *Sep Purif Technol.*, 9, 595-604, 2011.

683 Simpson, R.D. Ecosystem services as substitute inputs: basic results and important implications for

684 conservation policy. *Ecol Econ.* 98, 102-108. 2014.

685 Vincent, J. R., Binkley, C.S., 1993. Efficient multiple-use forestry may require land-use specialization. *Land*  
686 *Econ.* 69, 370-376.

687 Wang, G., Yang, H., Wang, L., Xu, Z., Xue, B.: Using the SWAT model to assess impacts of land use changes  
688 on runoff generation in headwaters, *Hydrol Process*, 28, 1032-1042, 2014.

689 Wang, X.L., Wang, Q., Wu, C.Q., Liang, T., Zheng, D.H., Wei, X.F.: A method coupled with remote sensing  
690 data to evaluate non-point source pollution in the Xin'anjiang catchment of China, *Sci Total Environ.*,  
691 430, 132-143, 2012.

692 Williams, J.R.: Sediment routing for agricultural watersheds, *Water Resour. Bull.*, 11, 965-974, 1975.

693 Yang, J., Reichert, P., Abbaspour, K.C., Xia, J., Yang, H.: Comparing uncertainty analysis techniques for a  
694 SWAT application to the Chaohe Basin in China, *J Hydrol.*, 358, 1-23, 2008.

695 Yang, J.L., Zhang, G.L., Zhao, Y.G.: Land use impact on nitrogen discharge by stream: a case study in  
696 subtropical hilly region of China, *Nutrient Cycling in Agroecosystems*, 77, 29-38, 2007.

697 Yang, Y., Wang, G., Wang, L., Yu, J., Xu, Z.: Evaluation of Gridded Precipitation Data for Driving SWAT  
698 Model in Area Upstream of Three Gorges Reservoir, *PLOS ONE*, 9, e112725. doi:  
699 10.1371/journal.pone.0112725, 2014.

700 Yin, G., Wang, N., Yuan, X.: Non-point source pollution of nitrogen and phosphorus nutrients using SWAT  
701 model in tumen river watershed, China, *Journal of Agro-Environment Science*, 30, 704-710, 2011.

702 Zhang, Y.H.: Development of Study on Model-SWAT and Its Application, *Progress in Geography*, 24, 121-  
703 130, 2005.
